# Supplementary material
Source: PubMed Central journal article supplement (PMC2077745)
Supplement: jnnpsyc_77_9_1095__1.pdf [file jnnpsyc_77_9_1095__1.pdf]

**Table. Basal and post-treatment scores of the dyskinesias scale on all the performed tasks. In italics: the task chosen for evaluation.**

| Treatment session                                    | Basal evaluation | Post-treatment evaluation |
|------------------------------------------------------|------------------|---------------------------|
| <b>1°) Real rTMS</b>                                 |                  |                           |
| - Staying at rest while performing an attention task | 3                | 1                         |
| - Walking                                            | 2                | 1                         |
| - Pouring water                                      | 4                | 1                         |
| - <i>Drinking from a glass</i>                       | <b>4</b>         | <b>1</b>                  |
| - Putting on a lab coat and buttoning                | 3                | 2                         |
| - Finger to nose manoeuvre                           | 3                | 1                         |
| <b>2°) Sham rTMS</b>                                 |                  |                           |
| - Staying at rest while performing an attention task | 2                | 2                         |
| - Walking                                            | 2                | 2                         |
| - Pouring water                                      | 3                | 3                         |
| - <i>Drinking from a glass</i>                       | <b>3</b>         | <b>3</b>                  |
| - Putting on a lab coat and buttoning                | 3                | 3                         |
| - Finger to nose manoeuvre                           | 3                | 3                         |
| <b>3°) Real rTMS</b>                                 |                  |                           |
| - Staying at rest while performing an attention task | 2                | 1                         |
| - Walking                                            | 2                | 1                         |
| - Pouring water                                      | 4                | 1                         |
| - <i>Drinking from a glass</i>                       | <b>4</b>         | <b>1</b>                  |
| - Putting on a lab coat and buttoning                | 3                | 2                         |
| - Finger to nose manoeuvre                           | 3                | 1                         |
